# Supplementary material for: Physicochemical Characteristics of Soluble Dietary Fiber Obtained from Grapefruit Peel Insoluble Dietary Fiber and Its Effects on Blueberry Jam
Source: MDPI journal article supplement (doi:10.3390/foods11223735), 2022-11-21
Supplement: s1 [file s1]

Supplementary Material

## **Physicochemical Characteristics of Soluble Dietary Fiber Obtained from Grapefruit Peel Insoluble Dietary Fiber and Its effects on Blueberry Jam**

Jiayan Xie, Guanyi Peng, Qiang Yu, Jianhua Xie, Yi Chen, Ruihong Dong, Jingyu Si, Chaoran Yang, Xiaobo Hu\*

Supplementary Tables S1–S2

**Table S1** Formulation of blueberry jams.

| Ingredients used to make jam | Amount (g, ingredients of 100 g blueberry pulp) |     |        |        |
|------------------------------|-------------------------------------------------|-----|--------|--------|
|                              | BJ                                              | LMJ | GPSJ-1 | GPSJ-2 |
| Sucrose                      | 30                                              | 30  | 30     | 30     |
| Citric acid                  | 0.1                                             | 0.1 | 0.1    | 0.1    |
| LM pectin                    | -                                               | 1.0 | -      | 0.5    |
| CaCl <sub>2</sub>            | 0.3                                             | 0.3 | 0.3    | 0.3    |
| GP-IDF-SDF                   | -                                               | -   | 1.0    | 0.5    |

Note: BJ, basic jam prepared with blueberry pulp, sucrose and citric acid; LMJ, jam prepared with blueberry pulp, sucrose, citric acid and 1% LM pectin; GPSJ-1, jam prepared with 1% GP-IDF-SDF; GPSJ-2, jam prepared with 0.5% GP-IDF-SDF and 0.5% LM pectin.

**Table S2** Monosaccharides composition ratio of GP-IDF-SDF.

| Monosaccharide           | Ratio |
|--------------------------|-------|
| Fructose (Fru)           | ND    |
| Rhamnose (Rha)           | ND    |
| Arabinose (Ara)          | 3.86  |
| Galactose (Gal)          | 1     |
| Glucose (Glu)            | 3.04  |
| Xylose (Xly)             | 2.19  |
| Mannose (Man)            | 1.11  |
| Galacturonic acid (Gala) | 6.06  |

Note: ND, not detected. Ratio means the amount of different monosaccharides in different samples comparted to the amount of mannose in GP-IDF-SDF.
